# Supplementary material
Source: HighWire-hosted journal article supplement (https://bmjopen.bmj.com/content/8/7/e021012)
Supplement: inline-supplementary-material-1 [file inline-supplementary-material-1.pdf]

## Appendix:

### Search equation Medline via Pubmed

#### Bloc 1 : skills

- 1- simulation training [MeSH Terms]
- 2- "simulation training" [Title/Abstract]
- 3- "patient simulation" [MeSH Terms]
- 4- "patient simulation" [Title/Abstract]
- 5- "simulated patient" [Title/Abstract]
- 6- "standardized patient" [Title/Abstract]
- 7- "standardised patient" [Title/Abstract]
- 8- "role-play"[Title/Abstract]
- 9- "role-playing"[Title/Abstract]
- 10- "role playing" [MeSH Terms]
- 11- "virtual reality" [MeSH Terms]
- 12- "virtual reality"[Title/Abstract]
- 13- "virtual-reality"[Title/Abstract]
- 14- "voice simulation"[Title/Abstract]
- 15- "manikins" [MeSH Terms]
- 16- "manikin"[Title/Abstract]
- 17- "mannequin"[Title/Abstract]
- 18- "objective structured clinical examination" [Other Term]
- 19- "objective structured clinical examination" [Title/Abstract]
- 20- "OSCE" [Title/Abstract]

➔ **Search bloc 1: A** = 1 OR 2 OR 3 OR 4 OR 5 OR 6 OR 7 OR 8 OR 9 OR 10 OR 11 OR 12 OR 13 OR 14 OR 15 OR 16 OR 17 OR 18 OR 19 OR 20

➔ **Search bloc 1: A=**

((((((((((((((((((simulation training [MeSH Terms]) OR "simulation training" [Title/Abstract]) OR "patient simulation" [MeSH Terms]) OR "patient simulation" [Title/Abstract]) OR "simulated patient" [Title/Abstract]) OR "standardized patient" [Title/Abstract]) OR "standardised patient" [Title/Abstract]) OR "role-play"[Title/Abstract]) OR "role-playing"[Title/Abstract]) OR "role playing" [MeSH Terms]) OR "virtual reality" [MeSH Terms]) OR "virtual reality"[Title/Abstract]) OR "virtual-reality"[Title/Abstract]) OR "voice simulation"[Title/Abstract]) OR "manikins" [MeSH Terms]) OR "manikin"[Title/Abstract]) OR "mannequin"[Title/Abstract]) OR "objective structured clinical examination" [Other Term]) OR "objective structured clinical examination" [Title/Abstract]) OR "OSCE" [Title/Abstract]

#### Bloc 2: psychiatry

- 1- psychiatry[MeSH Terms]
- 2- psychiatry[Title/Abstract]
- 3- psychiatric [Title/Abstract]
- 4- mental disorders[MeSH Terms]

- 5- "mental disorders"[Title/Abstract]
- 6- "psychiatric disorders"[Title/Abstract]
- 7- mental health[MeSH Terms]
- 8- "mental health"[Title/Abstract]
- 9- mood disorders [MeSH Terms]
- 10-"mood disorders"[Title/Abstract]
- 11-depression [MeSH Terms]
- 12-depression [Title/Abstract]
- 13-bipolar disorder [MeSH Terms]
- 14-maniac [Title/Abstract]
- 15-schizophrenia [MeSH Terms]
- 16-schizophrenia [Title/Abstract]
- 17-psychotic disorders [MeSH Terms]
- 18-psychotic disorders [Title/Abstract]
- 19-paranoid disorders [MeSH Terms]
- 20-paranoid disorders [Title/Abstract]
- 21-anxiety disorders [MeSH Terms]
- 22-"anxiety disorders"[Title/Abstract]
- 23-"social anxiety"[Title/Abstract]
- 24- "generalized anxiety disorders"[Title/Abstract]
- 25-panic disorder [MeSH Terms]
- 26-"panic disorder"[Title/Abstract]
- 27-agoraphobia [MeSH Terms]
- 28-agoraphobia [Title/Abstract]
- 29-"psychological trauma"[Title/Abstract]
- 30-"mental trauma"[Title/Abstract]
- 31-Stress Disorders, Post-Traumatic[MeSH Terms]
- 32-"Post-traumatic stress disorders"[Title/Abstract]
- 33- Stress Disorders, Traumatic, Acute [MeSH Terms]
- 34-"Acute Stress Disorders"[Title/Abstract]
- 35-Obsessive-Compulsive Disorder [MeSH Terms]
- 36-"Obsessive-Compulsive Disorder" [Title/Abstract]
- 37-personality disorders [MeSH Terms]
- 38-"personality disorders"[Title/Abstract]
- 39-addictology [Title/Abstract]
- 40-alcoholism [MeSH Terms]
- 41-alcoholism [Title/Abstract]
- 42-substance-related disorders [MeSH Terms]
- 43-behavior, addictive [MeSH Terms]
- 44-addictive [Title/Abstract]
- 45-"substance abuse"[Title/Abstract]
- 46-suicide, attempted [MeSH Terms]
- 47- suicide [Title/Abstract]
- 48-agitation [Title/Abstract]
- 49-violence [Title/Abstract]
- 50-delirium [Title/Abstract]
- 51-delusions [MeSH Terms]
- 52-Feeding and Eating Disorders [MeSH Terms]
- 53-"Eating Disorders"[Title/Abstract]
- 54-anorexia nervosa [MeSH Terms]





[MeSH Terms]) OR "personality disorders"[Title/Abstract]) OR addictology [Title/Abstract]) OR alcoholism [MeSH Terms]) OR alcoholism [Title/Abstract]) OR substance-related disorders [MeSH Terms]) OR behavior, addictive [MeSH Terms]) OR addictive [Title/Abstract]) OR "substance abuse"[Title/Abstract]) OR suicide, attempted [MeSH Terms]) OR suicide [Title/Abstract]) OR agitation [Title/Abstract]) OR violence [Title/Abstract]) OR delirium [Title/Abstract]) OR delusions [MeSH Terms]) OR (Feeding and Eating Disorders [MeSH Terms])) OR "Eating Disorders"[Title/Abstract]) OR anorexia nervosa [MeSH Terms]) OR "anorexia nervosa"[Title/Abstract]) OR bulimia nervosa [MeSH Terms]) OR "bulimia nervosa"[Title/Abstract]) OR "binge-eating disorders"[Title/Abstract]) OR binge-eating disorders [MeSH Terms]) OR psychosomatic [Title/Abstract]) OR psychophysiologic disorders[MeSH Terms]) OR "somatoform disorders"[Title/Abstract]) OR somatoform disorders[MeSH Terms]) OR attention deficit disorder with hyperactivity [MeSH Terms]) OR "attention deficit disorder with hyperactivity"[Title/Abstract]) OR ADHD [Title/Abstract]) OR child development disorders, pervasive [MeSH Terms]) OR "child development disorders"[Title/Abstract]) OR Autism Spectrum Disorder [MeSH Terms]) OR Autism [Title/Abstract]) OR asperger syndrome [MeSH Terms]) OR asperger [Title/Abstract]) OR child psychiatry [MeSH Terms]) OR adolescent psychiatry [MeSH Terms]) OR geriatric psychiatry [MeSH Terms]) OR military psychiatry [MeSH Terms]) OR Psychiatric nursing [MeSH Terms]) OR psychiatric aides [MeSH Terms])
